# Supplementary material for: Characterization of the Bacterial Community of Rumen in Dairy Cows with Laminitis
Source: MDPI journal article supplement (doi:10.3390/genes12121996), 2021-12-16
Supplement: s1 [file s1]

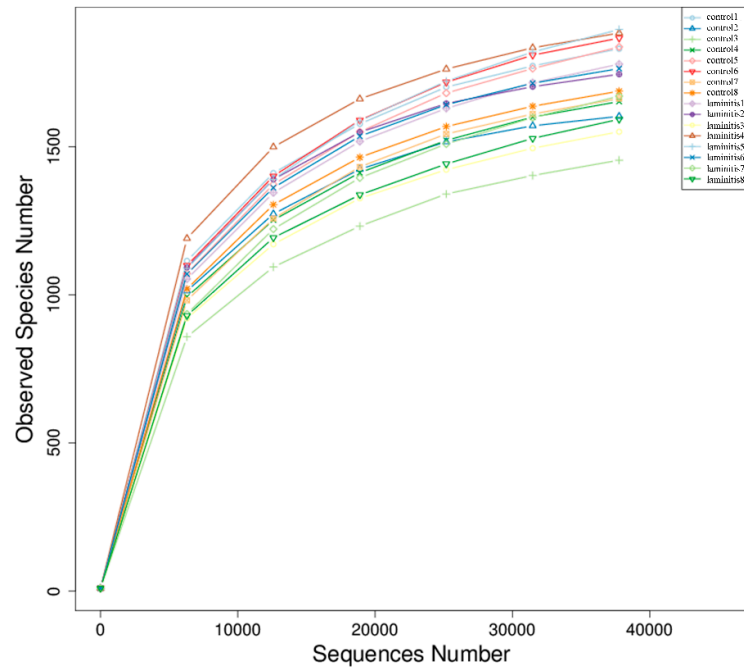

**Figure S1.** Rarefaction curves comparing the number of reads with the number of phylotypes found in the DNA from rumen fluid of healthy bovines and laminitis bovines.
